# Supplementary material
Source: publisher figshare collection journal article supplement (https://acs.figshare.com/ndownloader/files/4668601)
Supplement: Supplementary file 1 [file 4668601]

## SUPPLEMENT INFORMATION

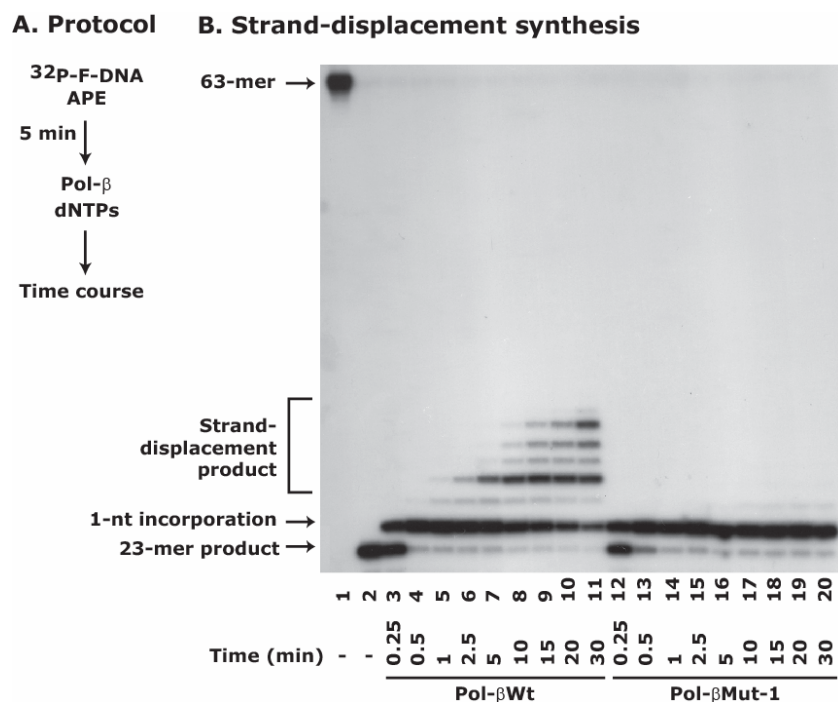

**Figure S1. Time dependence of strand-displacement synthesis inhibition by Pol- $\beta$ Mut-1.**

**Panel A:** Schematic representation of the protocol. **Panel B:** Effect of Pol- $\beta$ Wt and Pol- $\beta$ Mut-1 proteins on the strand-displacement synthesis. The  $^{32}\text{P}$ -F-DNA (2.5 nM) was pre-cut with APE (1 nM) and mixed with 5.0 nM of either Pol- $\beta$ Wt or Pol- $\beta$ Mut-1 protein, respectively, and dNTPs. The reaction was terminated at the time intervals indicated and processed for electrophoresis and autoradiography. Lane 1 shows  $^{32}\text{P}$ -labeled 63-mer F-DNA and Lane 2 shows the 23-mer product after APE incision. The data presented are representative of three different experiments.

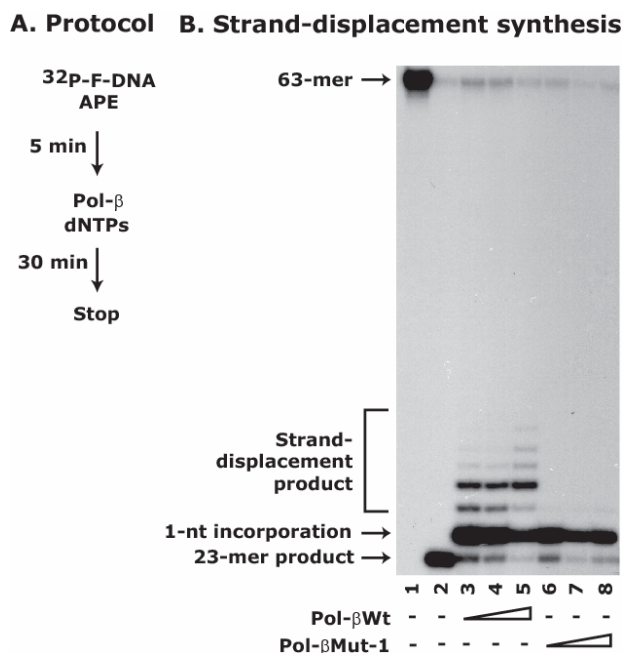

**Figure S2. Concentration dependence of strand displacement synthesis inhibition by Pol-βMut-1. Panel A:** Schematic representation of the protocol. **Panel B:** Effect of Pol-βWt and Pol-βMut-1 proteins on strand-displacement synthesis. The  $^{32}\text{P}$ -F-DNA (2.5 nM) was pre-cut with APE (1 nM) and mixed with 1.0, 2.5 and 5.0 nM of either Pol-βWt (lanes 3-5) or Pol-βMut-1 protein (lanes 6-8), respectively, and dNTPs. The reactions were terminated after 30 min. The samples were processed for electrophoresis and autoradiography. Lane 1 shows  $^{32}\text{P}$ -labeled 63-mer F-DNA and Lane 2 shows the 23-mer product after APE incision. The data presented are representative of three different experiments.

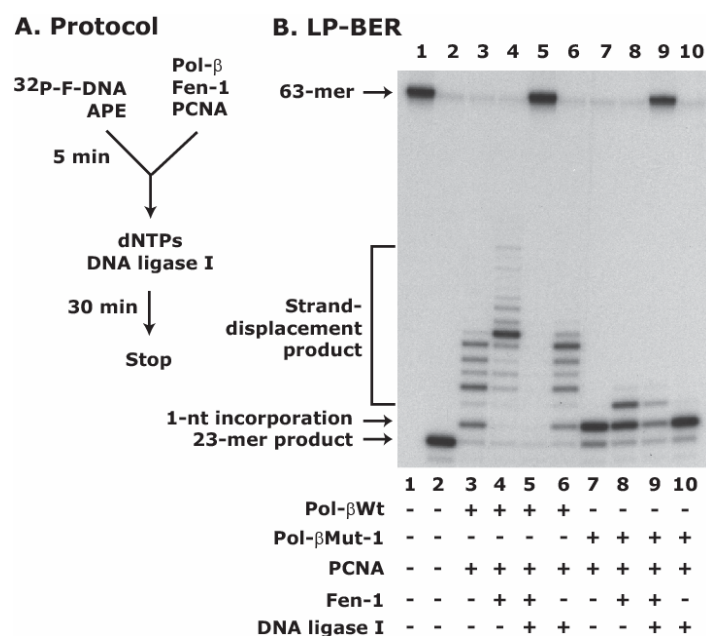

**Figure S3. Analysis of requirement for Fen-1 in Pol-βMut-1-directed BER activity with F-DNA. Panel A:** Schematic representation of the protocol. **Panel B:** Effect of Fen-1 on the Pol-βMut-1-directed BER activity. The reaction mixture containing <sup>32</sup>P-F-DNA (2.5 nM, precut with 1 nM APE), PCNA (2.5 nM) and Pol-β (5.0 nM) and Fen-1 (0.2 nM) was incubated for 5 min at 22 °C prior to mixing with dNTPs and DNA ligase I (0.4 nM) and incubation was continued for an additional 30 min at 37 °C. Lane 1 shows <sup>32</sup>P-labeled 63-mer F-DNA and Lane 2 shows the 23-mer product after APE incision. The data presented are representative of three different experiments.
